# Supplementary material for: Fizzy-Related dictates A cell cycle switch during organ repair and tissue growth responses in the Drosophila hindgut
Source: eLife journal article supplement (doi:10.7554/elife.38327), 2018-08-17
Supplement: supp [file elife-38327-supp-v1.zip]

Archive with 7 entries (7 files):
- elife_poa_e38327_Figure_2_figure_supplement_1.pdf
- elife_poa_e38327_Figure_1_figure_supplement_1.pdf
- elife_poa_e38327_Transparent_Reporting_File.xlsx
- elife_poa_e38327_Figure_3_figure_supplement_1.pdf
- elife_poa_e38327_Figure_4_figure_supplement_1.pdf
- elife_poa_e38327_Figure_5_figure_supplement_1.pdf
- elife_poa_e38327_Transparent_Reporting_File.docx
