# Supplementary material for: Fizzy-Related dictates A cell cycle switch during organ repair and tissue growth responses in the Drosophila hindgut
Source: eLife journal article supplement (doi:10.7554/elife.38327), 2018-08-17
Supplement: supp [file elife-38327-supp-v1.zip › elife_poa_e38327_Transparent_Reporting_File.xlsx]

## Sheet: Sheet1
Figure	Panel	Condition	#N	Analysis	P-values (adjusted)
Fig1	G	Uninjured	10	One way ANOVA with Dunnett's multiple comparisons test (each vs Uninjured)	-
		Injured larva	5		0.9961
		Adult injury 12hr	5		0.9853
		Adult injury 24hr	6		0.2276
		Adult injury 36hr	7		<0.0001
		Adult injury 48hr	3		<0.0001
	H	Uninjured	18	One way ANOVA with Dunnett's multiple comparisons test	-
		Injured larva	8		>0.9999
		Adult injury 12hr	11		0.0011
		Adult injury 24hr	15		<0.0001
		Adult injury 36hr	12		<0.0001
		Adult injury 48hr	5		<0.0001
	I	Uninjured	10	One way ANOVA with Dunnett's multiple comparisons test	-
		Injured larva	5		0.5404
		Adult injury 12hr	5		0.9964
		Adult injury 24hr	6		0.9997
		Adult injury 36hr	7		0.6413
		Adult injury 48hr	3		>0.9999
Fig2	G	Uninjured larva	18	Unpaired, two tail t-test	<0.0001
		Inured larva	13
		Uninjured adult	27	Unpaired, two tail t-test	0.1678
		Injured adult	14
Fig3	E	18C	9
		29C	9
		Heat shock + 29C	9
	F	29C	9	Unpaired, two tail t-test	0.0003
		Heat shock + 29C	9
Fig4	F	Uninjured	6	One way ANOVA with Tyukey's multiple comparisons test	Uninjured vs Injured fzrRNAi = 0.0012
		Injured no RNAi	5		Uninjured vs Injured no RNAi = 0.0002
		Injured fzr RNAi	6		Injured fzr RNAi vs Injured no RNAi = 0.7678
	I	Uninjured	7	One way ANOVA with Dunnett's multiple comparisons test	-
		Injured no RNAi	6		<0.0001
		Injured fzr RNAi	9		0.6115
	J	Injured no RNAi	5	Unpaired, two tail t-test	0.0001
		Injured fzr RNAi	4
Fig5	G	No Transgene	5	Unpaired, two tail t-test	0.0012
		Larval RasV12	5
		No Transgene	15	One way ANOVA with Dunnett's multiple comparisons test	-
		Adult RASV12	11		0.0573
		Adult RASV12, fzr RNAi	9		0.0238
	H	No Transgene	4	Unpaired, two tail t-test	0.0133
		Larval RasV12	5
		No Transgene	6	One way ANOVA with Dunnett's multiple comparisons test
		Adult RASV12	5		<0.0001
		Adult RASV12, fzr RNAi	5		0.3333
	L	No Transgene	3 (repeats),N=15 animals	One way ANOVA with Tukey's multiple comparisons test	vs fzr RNAi: >0.99. vs Rasv12: >0.99, vs RASv12,fzrRNAi : <0.0001
		fzr RNAi	3 repeats N= 12 animals		vs RASv12: >0.99, vs RASv12,fzrRNAi : <0.0001
		Adult RASV12	3 (repeats),N=20 animals		vs RASv12,fzrRNAi : <0.0001
		Adult RASV12, fzr RNAi	3 (repeats),N=24 animals		-
	M	No Transgene	3 (repeats),N=29 animals	One way ANOVA with Tukey's multiple comparisons test	vs fzr RNAi: >0.97. vs Rasv12: >0.99, vs RASv12,fzrRNAi : 0.0037
		fzr RNAi	3 repeats N=61 animals		vs RASv12: >0.99, vs RASv12,fzrRNAi : 0.0048
		Adult RASV12	3 (repeats),N=41 animals		vs RASv12,fzrRNAi : 0.0062
		Adult RASV12, fzr RNAi	3 (repeats),N=29 animals		-
FigS1	E	Uninjured larva	7	Unpaired, two tail t-test	<0.0001
		Injured larva	8
	H	Uninjured larva	5	Unpaired, two tail t-test	0.2683
		Injured larva	5
	I	Uninjured	5	One way ANOVA with Dunnett's multiple comparisons test performed on Log2 values	-
		Adult injury 12hr	4		0.1182
		Adult injury 24hr	5		0.0103
		Adult injury 36hr	5		<0.0001
FigS2	B	Larval no heat shock	14	Unpaired, two tail t-test	0.1371
		Larval heat shock	48
		Adult no heat shock	10	Unpaired, two tail t-test	0.0351
		Adult heat shock	27
	E	Uninjured larva	88	Unpaired, two tail t-test	<0.0001
		Injured larva	60
	H	Uninjured adult	91	Unpaired, two tail t-test	0.9135
		Injured adult	115
FigS3	D'	no heat shock	6	Unpaired, two tail t-test	0.0007
		heat shock	5
FigS4	C	Injured	3	Unpaired, two tail t-test	0.678
		Injured fzr RNAi	6
Fig5	D'	No Transgene	10	One way ANOVA with Tukey's multiple comparisons test
		Adult RASV12	11		vs No Transgene: <0.0001
		Adult RASV12, fzr RNAi	9		vs No Transgene:0.0726 , vs vs RASv12 <0.0001
