# Supplementary figures and images for: Fizzy-Related dictates A cell cycle switch during organ repair and tissue growth responses in the Drosophila hindgut
Source: eLife journal article supplement (doi:10.7554/elife.38327), 2018-08-17

**Figure2 -figure supplement 1**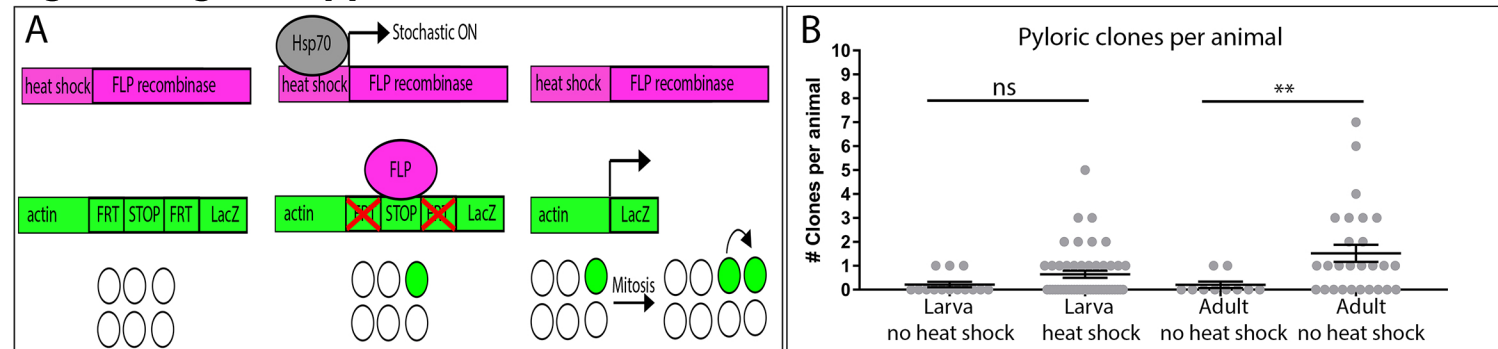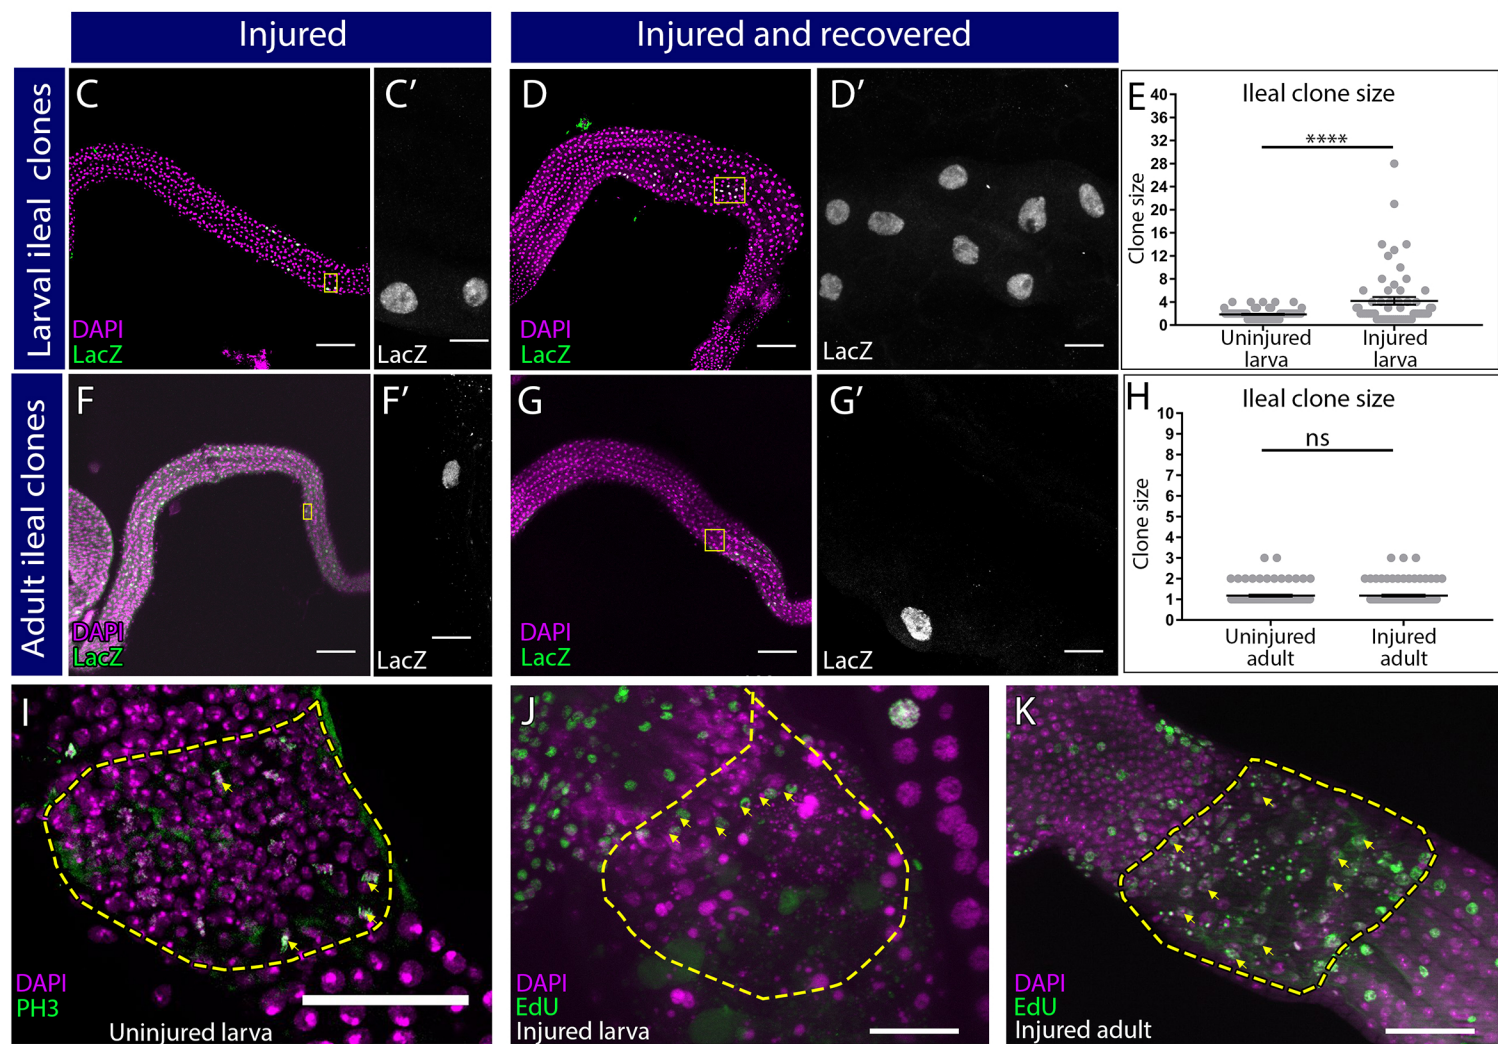

Supplement: supp [file elife-38327-supp-v1.zip › elife_poa_e38327_Figure_2_figure_supplement_1.pdf]

**Figure 1-figure supplement 1**

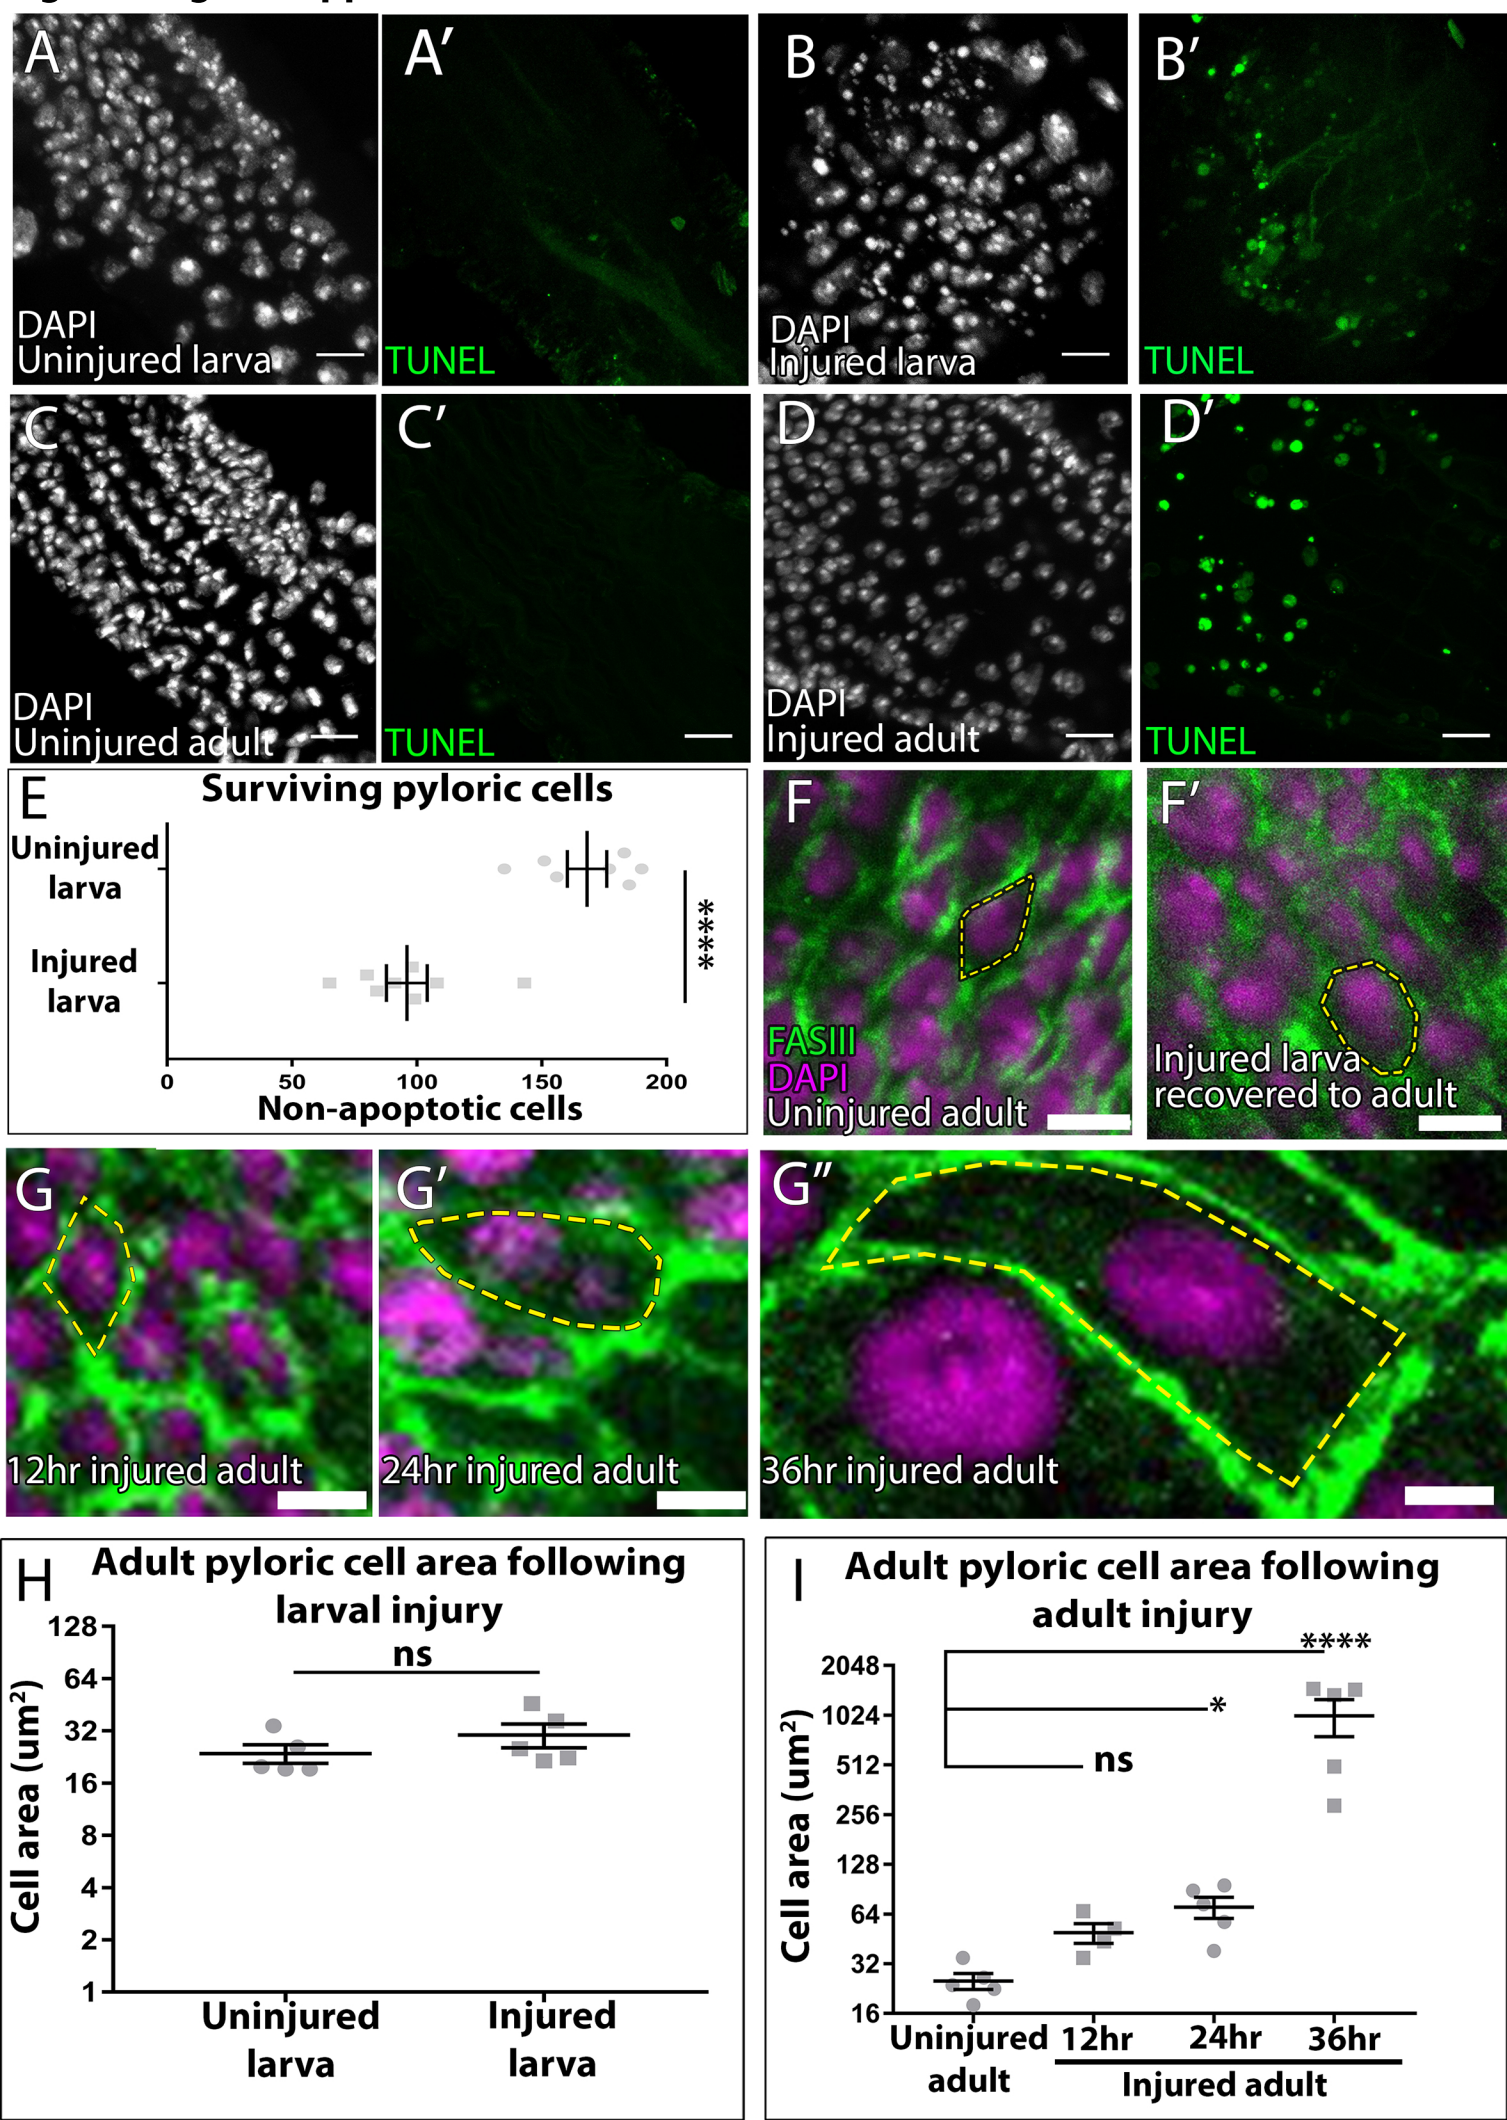

Supplement: supp [file elife-38327-supp-v1.zip › elife_poa_e38327_Figure_1_figure_supplement_1.pdf]

Figure3 -figure supplement 1

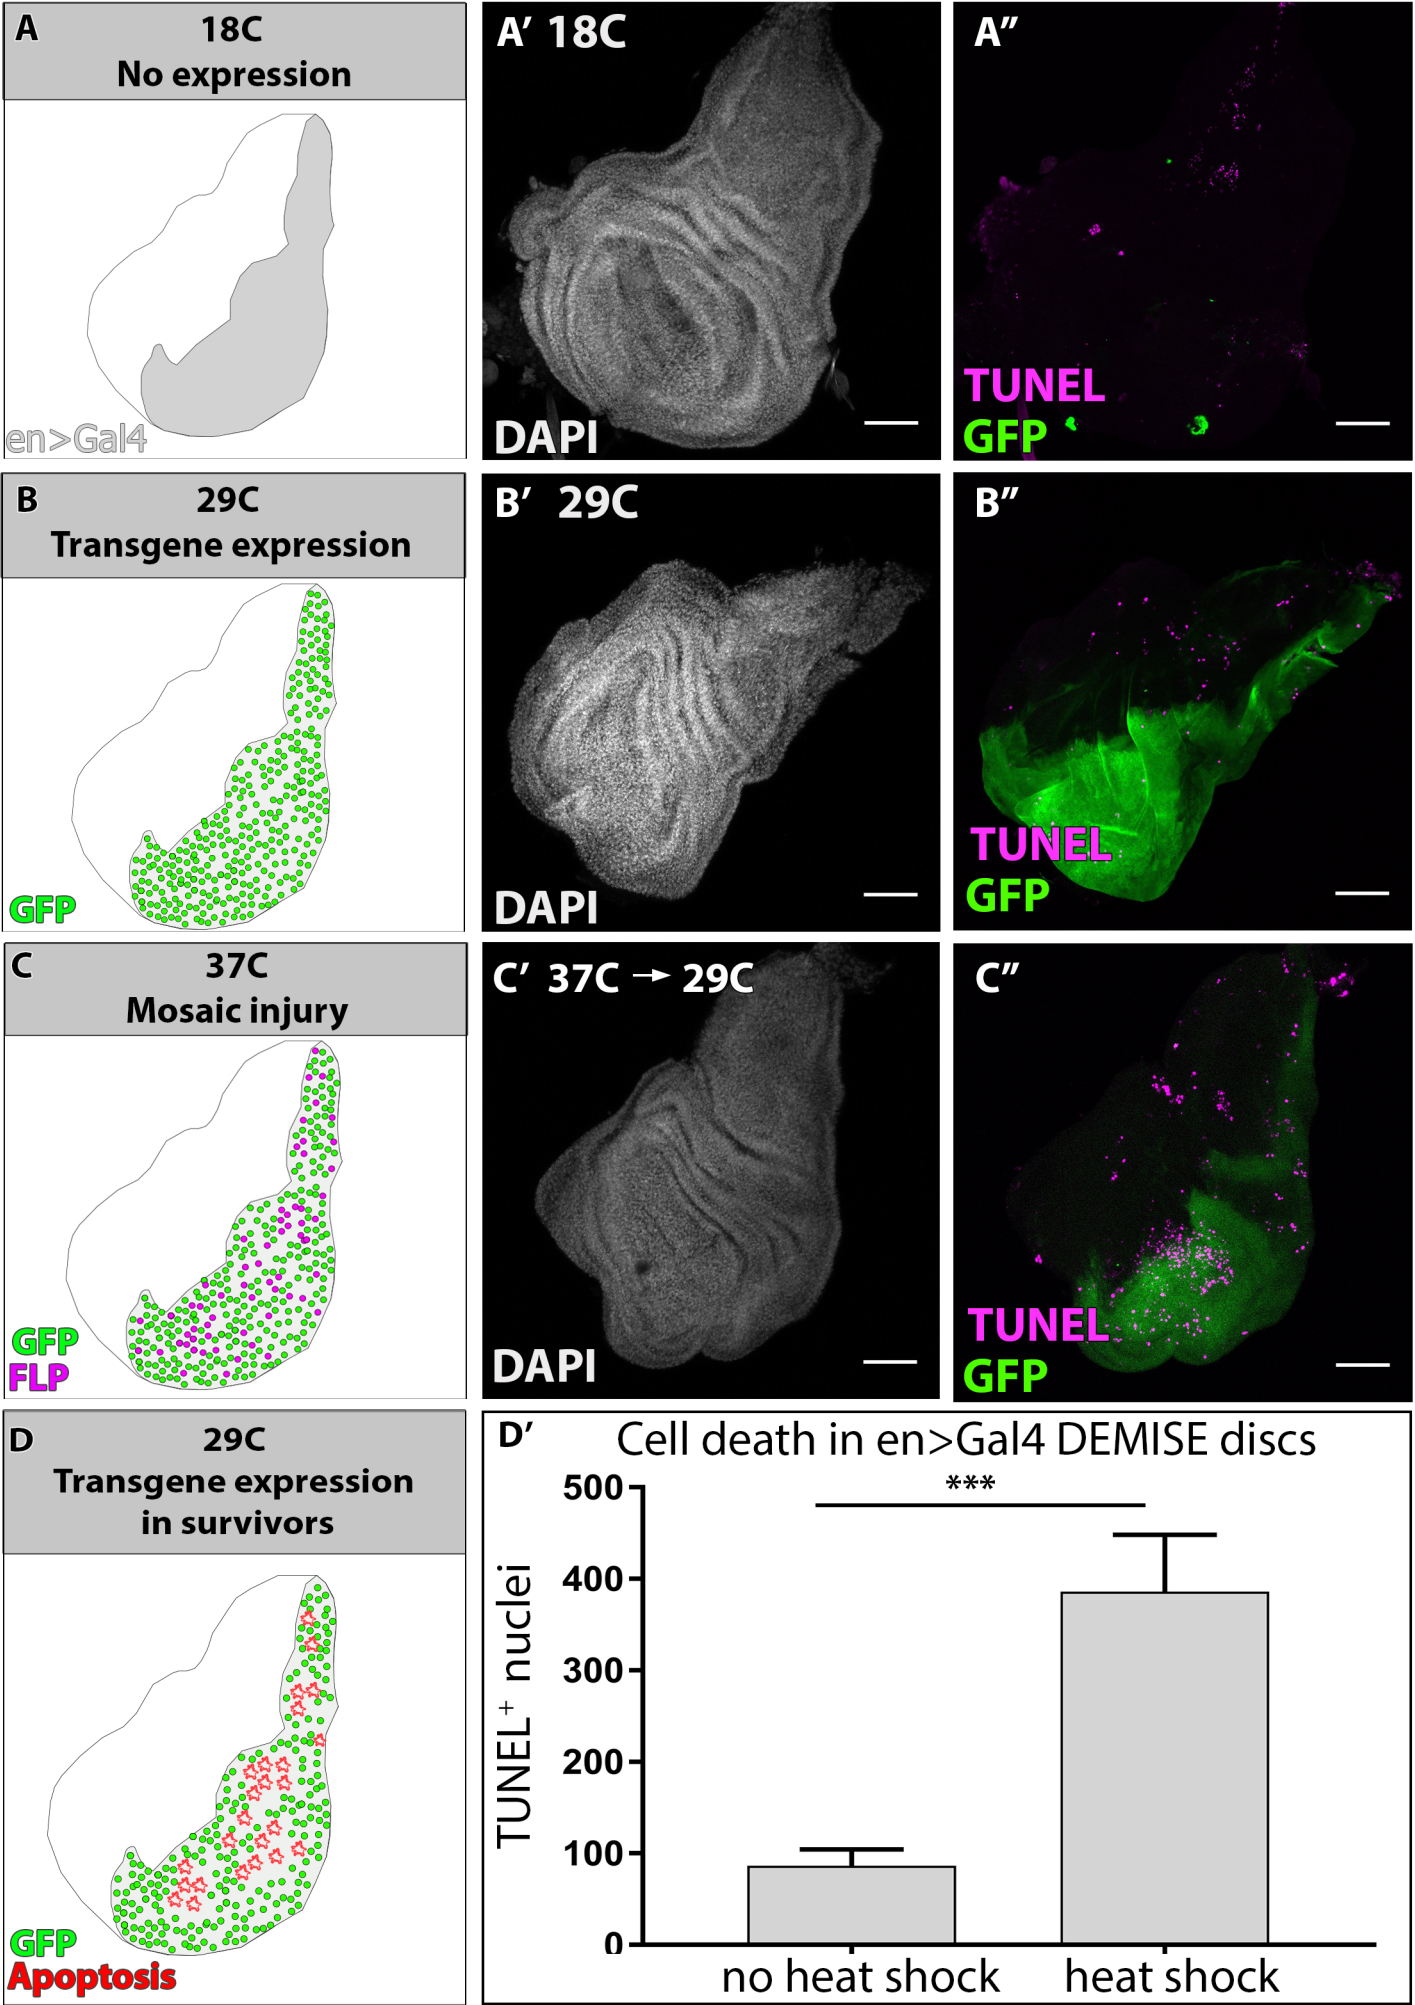

Supplement: supp [file elife-38327-supp-v1.zip › elife_poa_e38327_Figure_3_figure_supplement_1.pdf]

Figure4-figure supplement 1

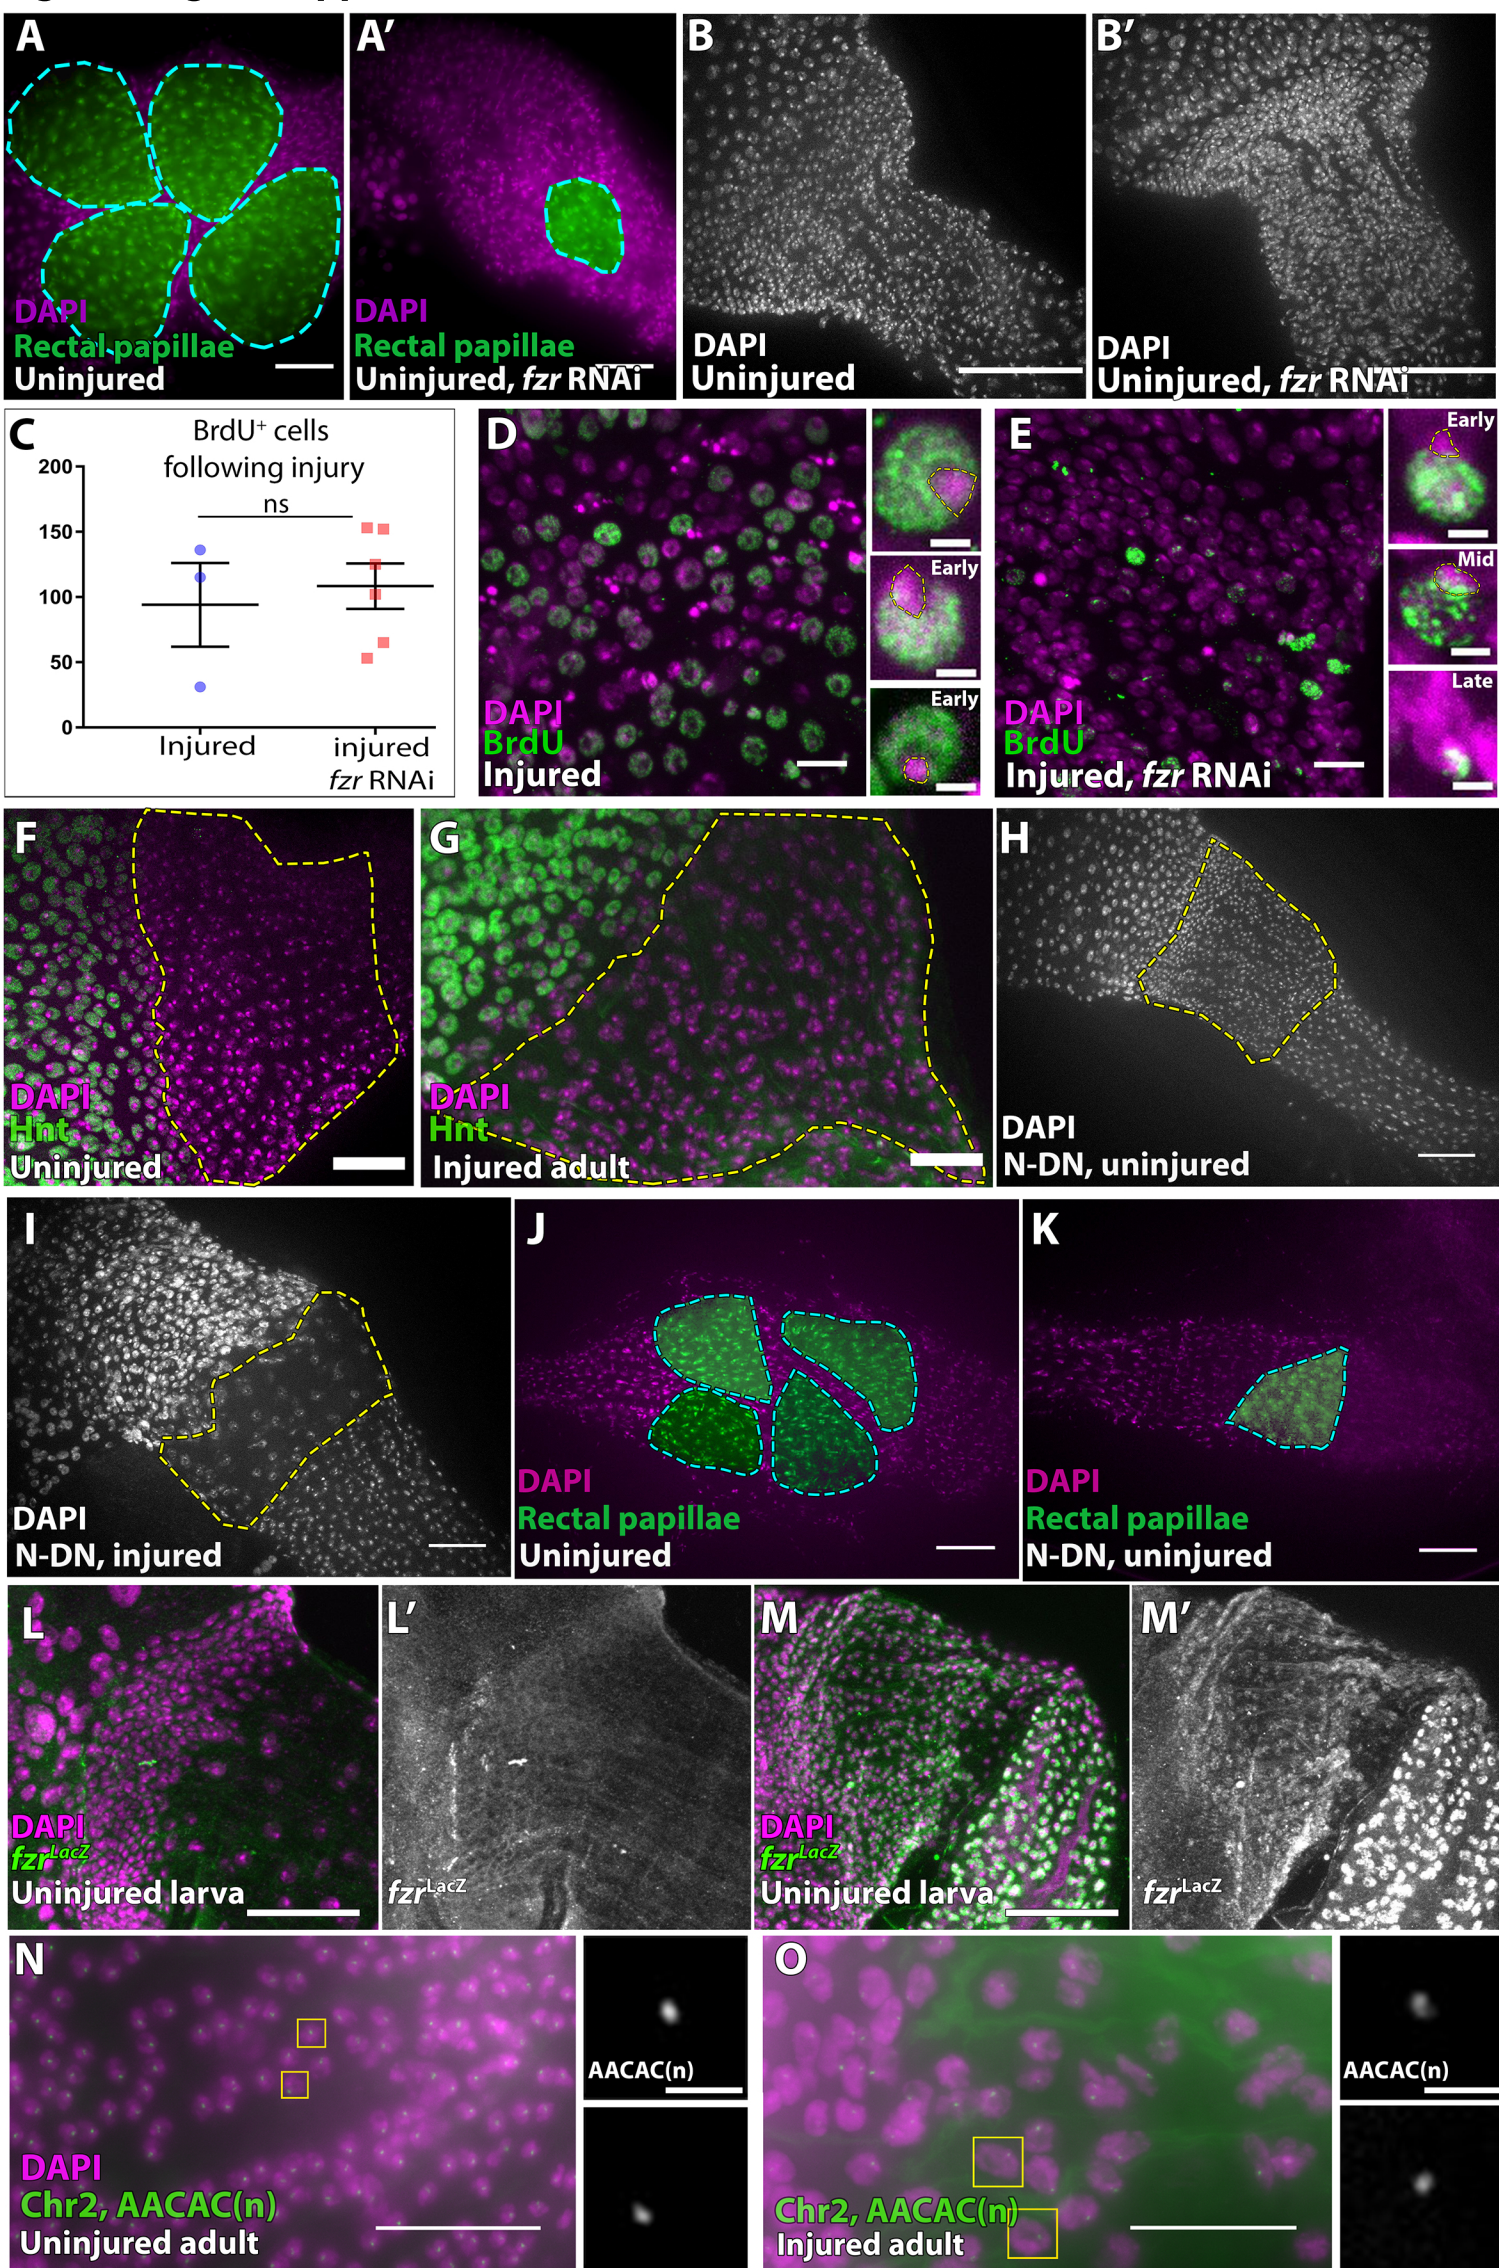

Supplement: supp [file elife-38327-supp-v1.zip › elife_poa_e38327_Figure_4_figure_supplement_1.pdf]

**Figure5 -figure supplement 1**

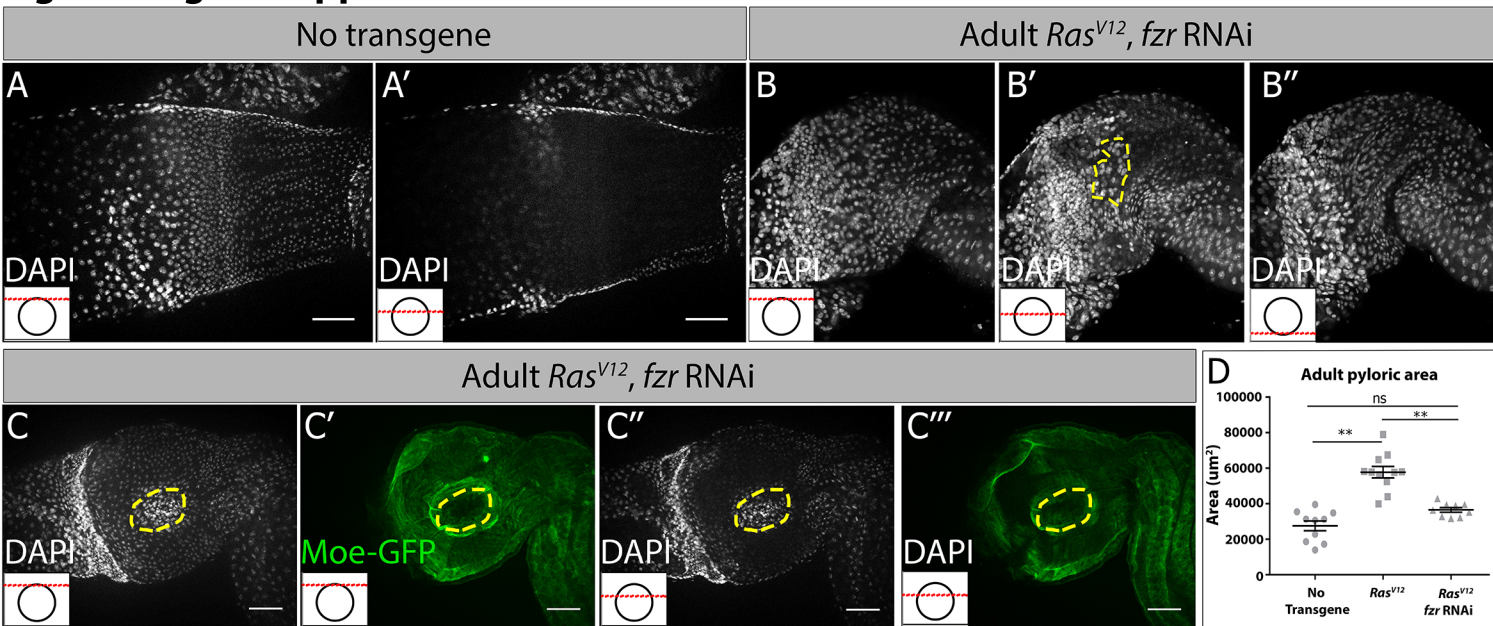

Supplement: supp [file elife-38327-supp-v1.zip › elife_poa_e38327_Figure_5_figure_supplement_1.pdf]
